# Supplementary material
Source: PubMed Central journal article supplement (PMC2711651)

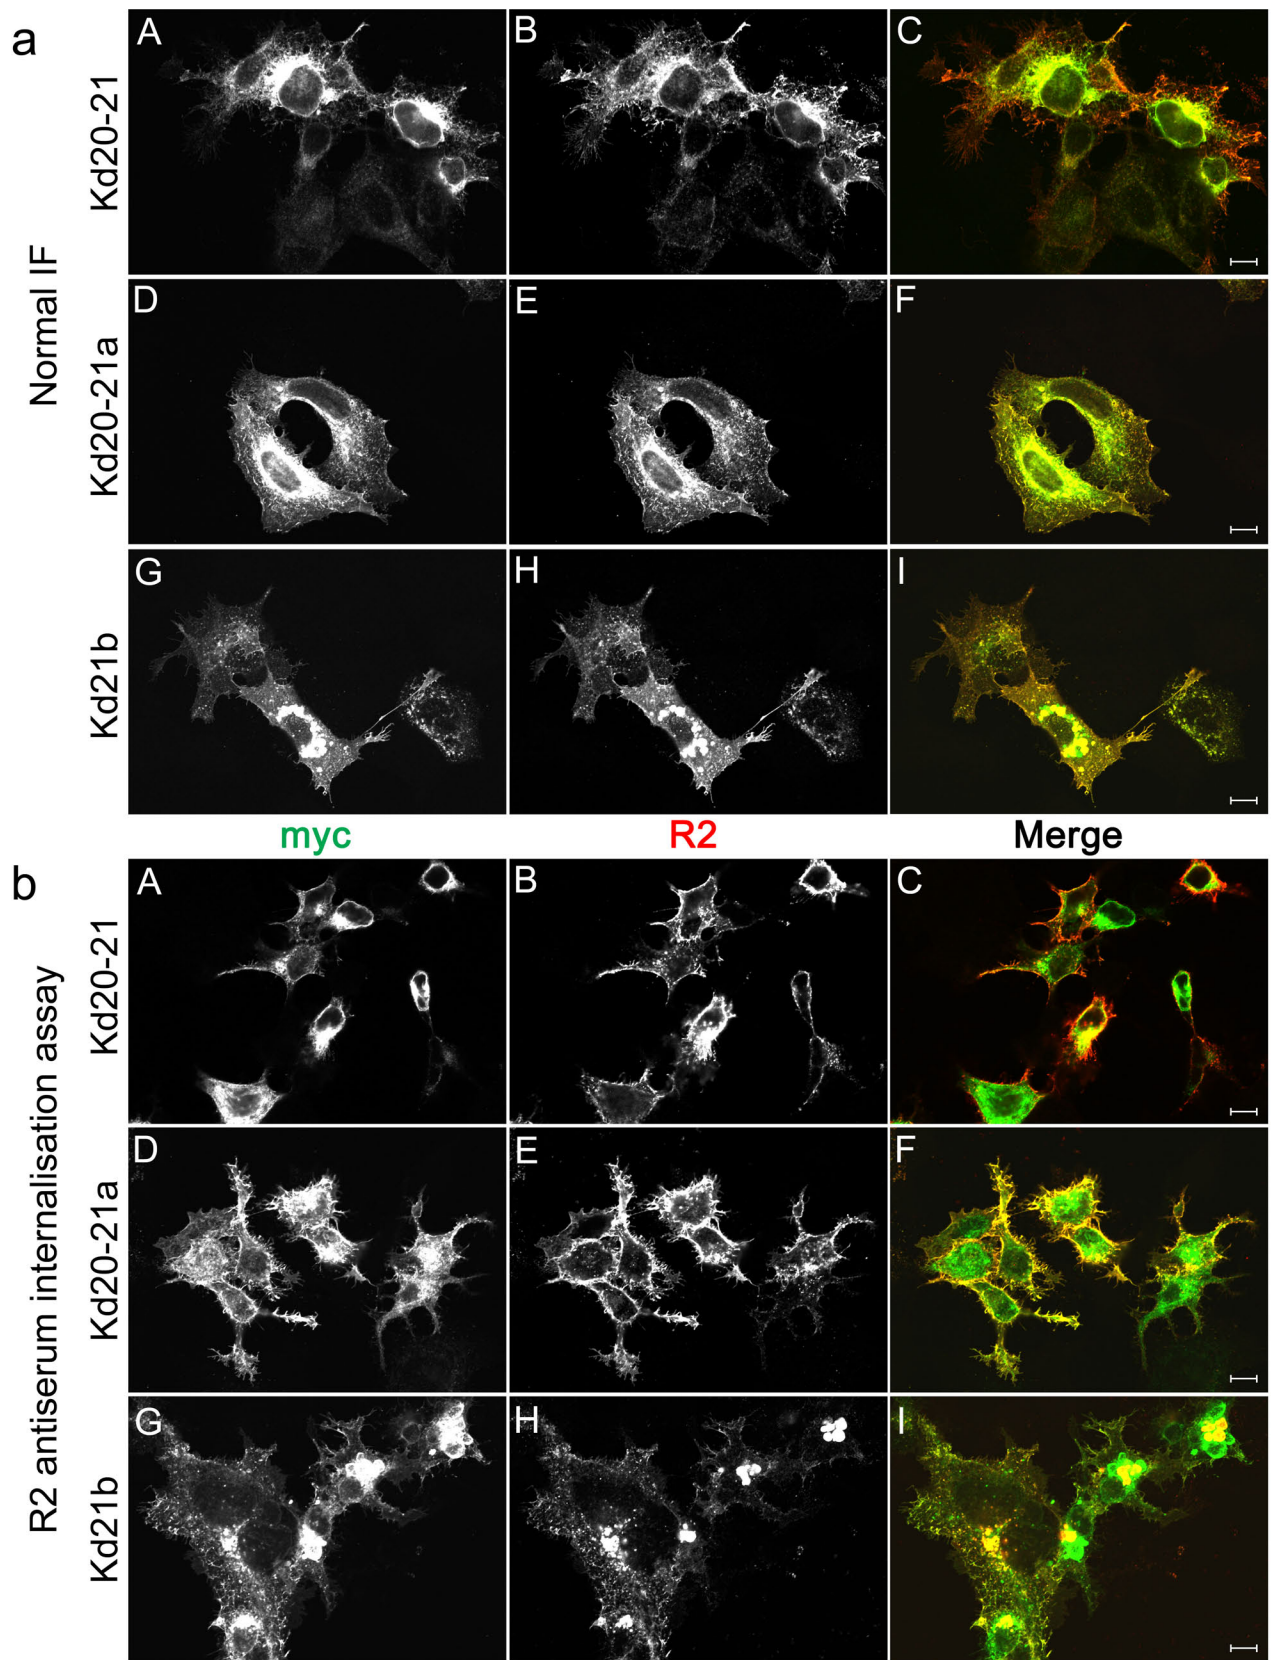

Supplementary Figure 1

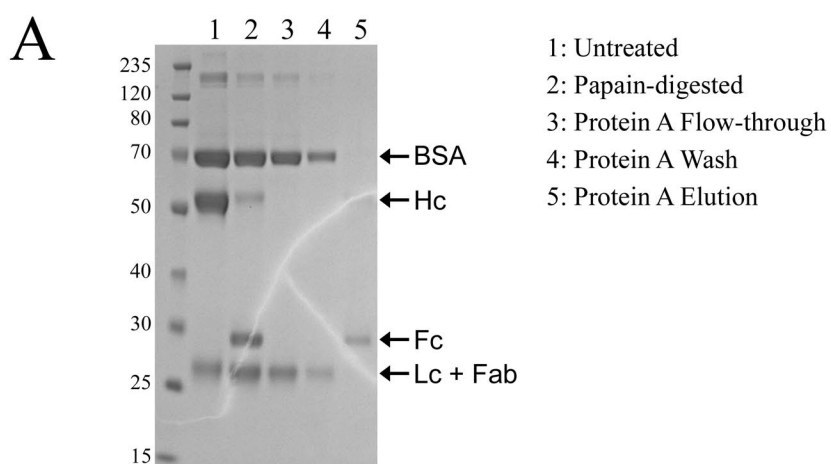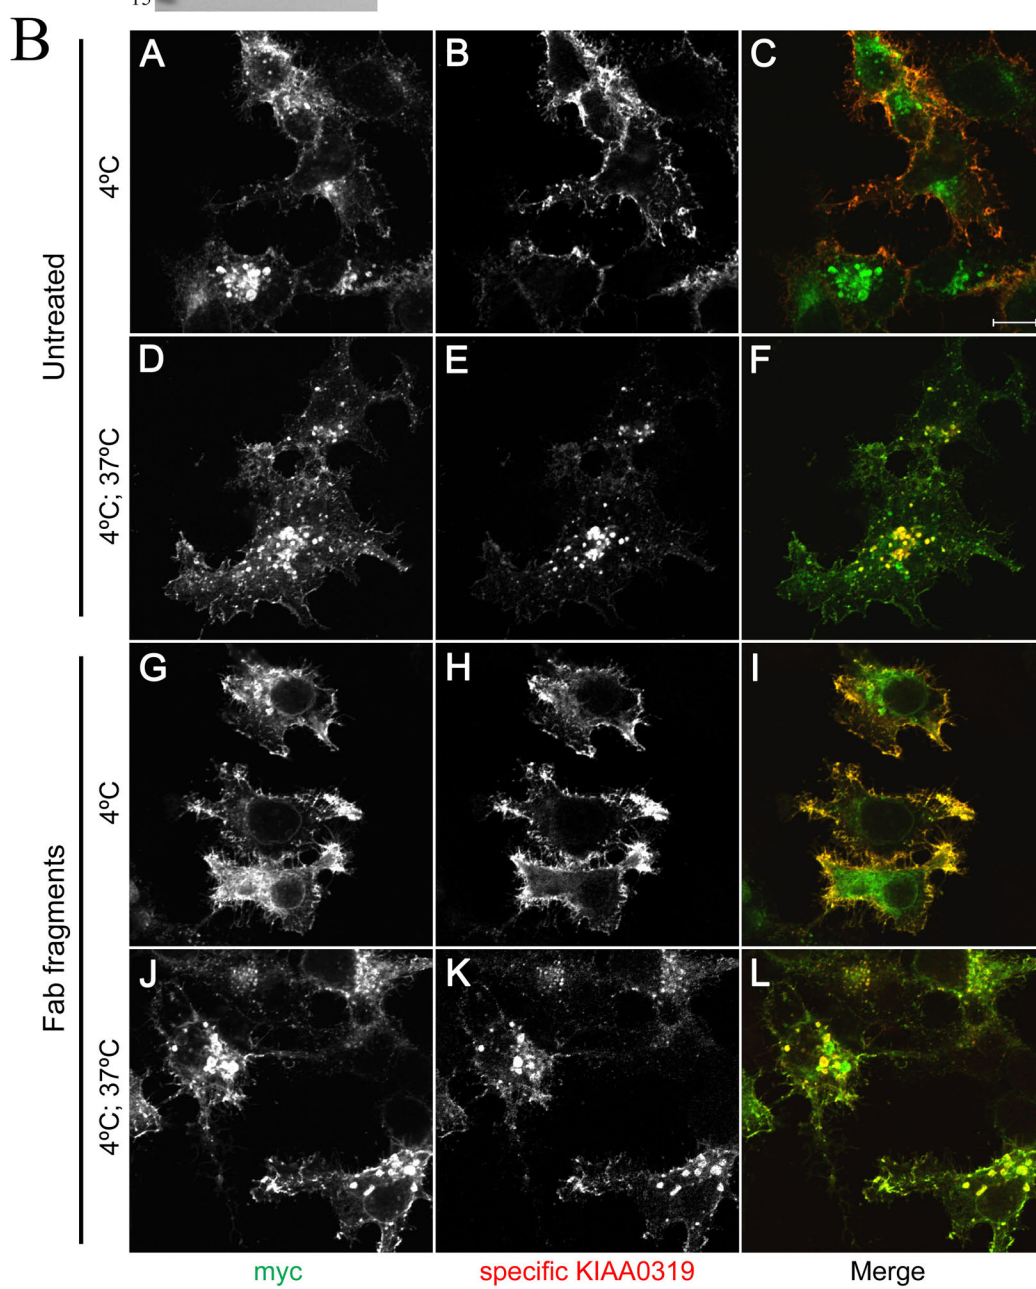

Supplementary Figure 2

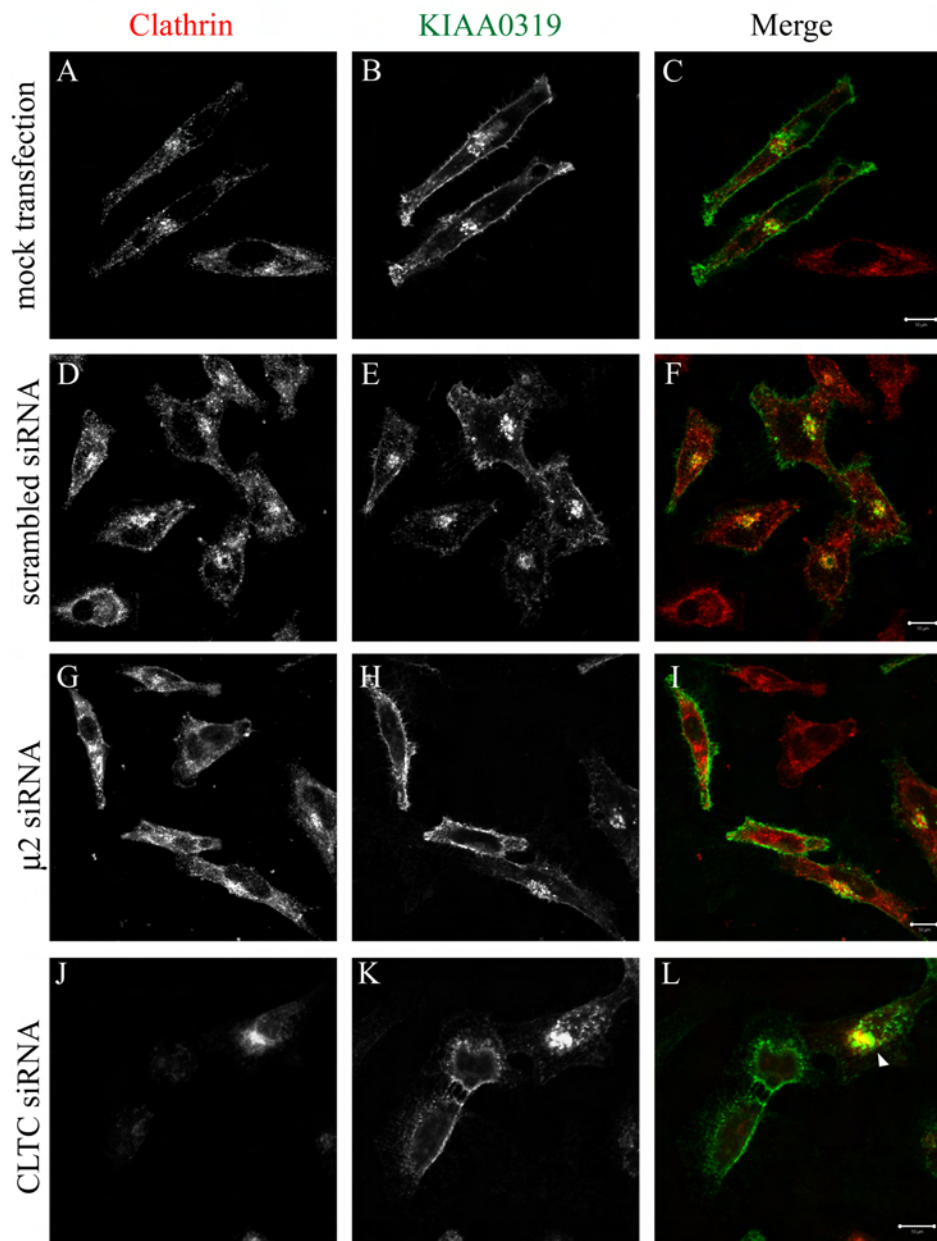

Supplementary Figure 3

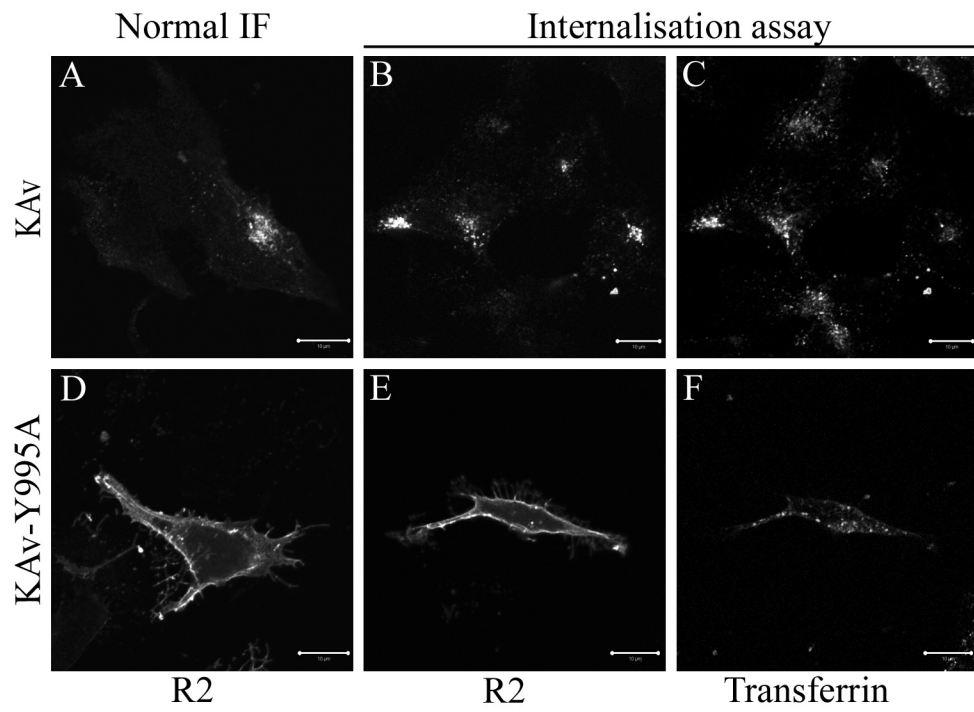

Supplementary Figure 4

Supplement: 00630.2008_1.pdf [file 00630.2008_1.pdf]
